# Supplementary material for: Prediction of reversible disulfide based on features from local structural signatures
Source: PubMed Central journal article supplement (PMC5379614; doi:10.1186/s12864-017-3668-8), 2017-04-04

# Extract reversible disulfide from PDB database

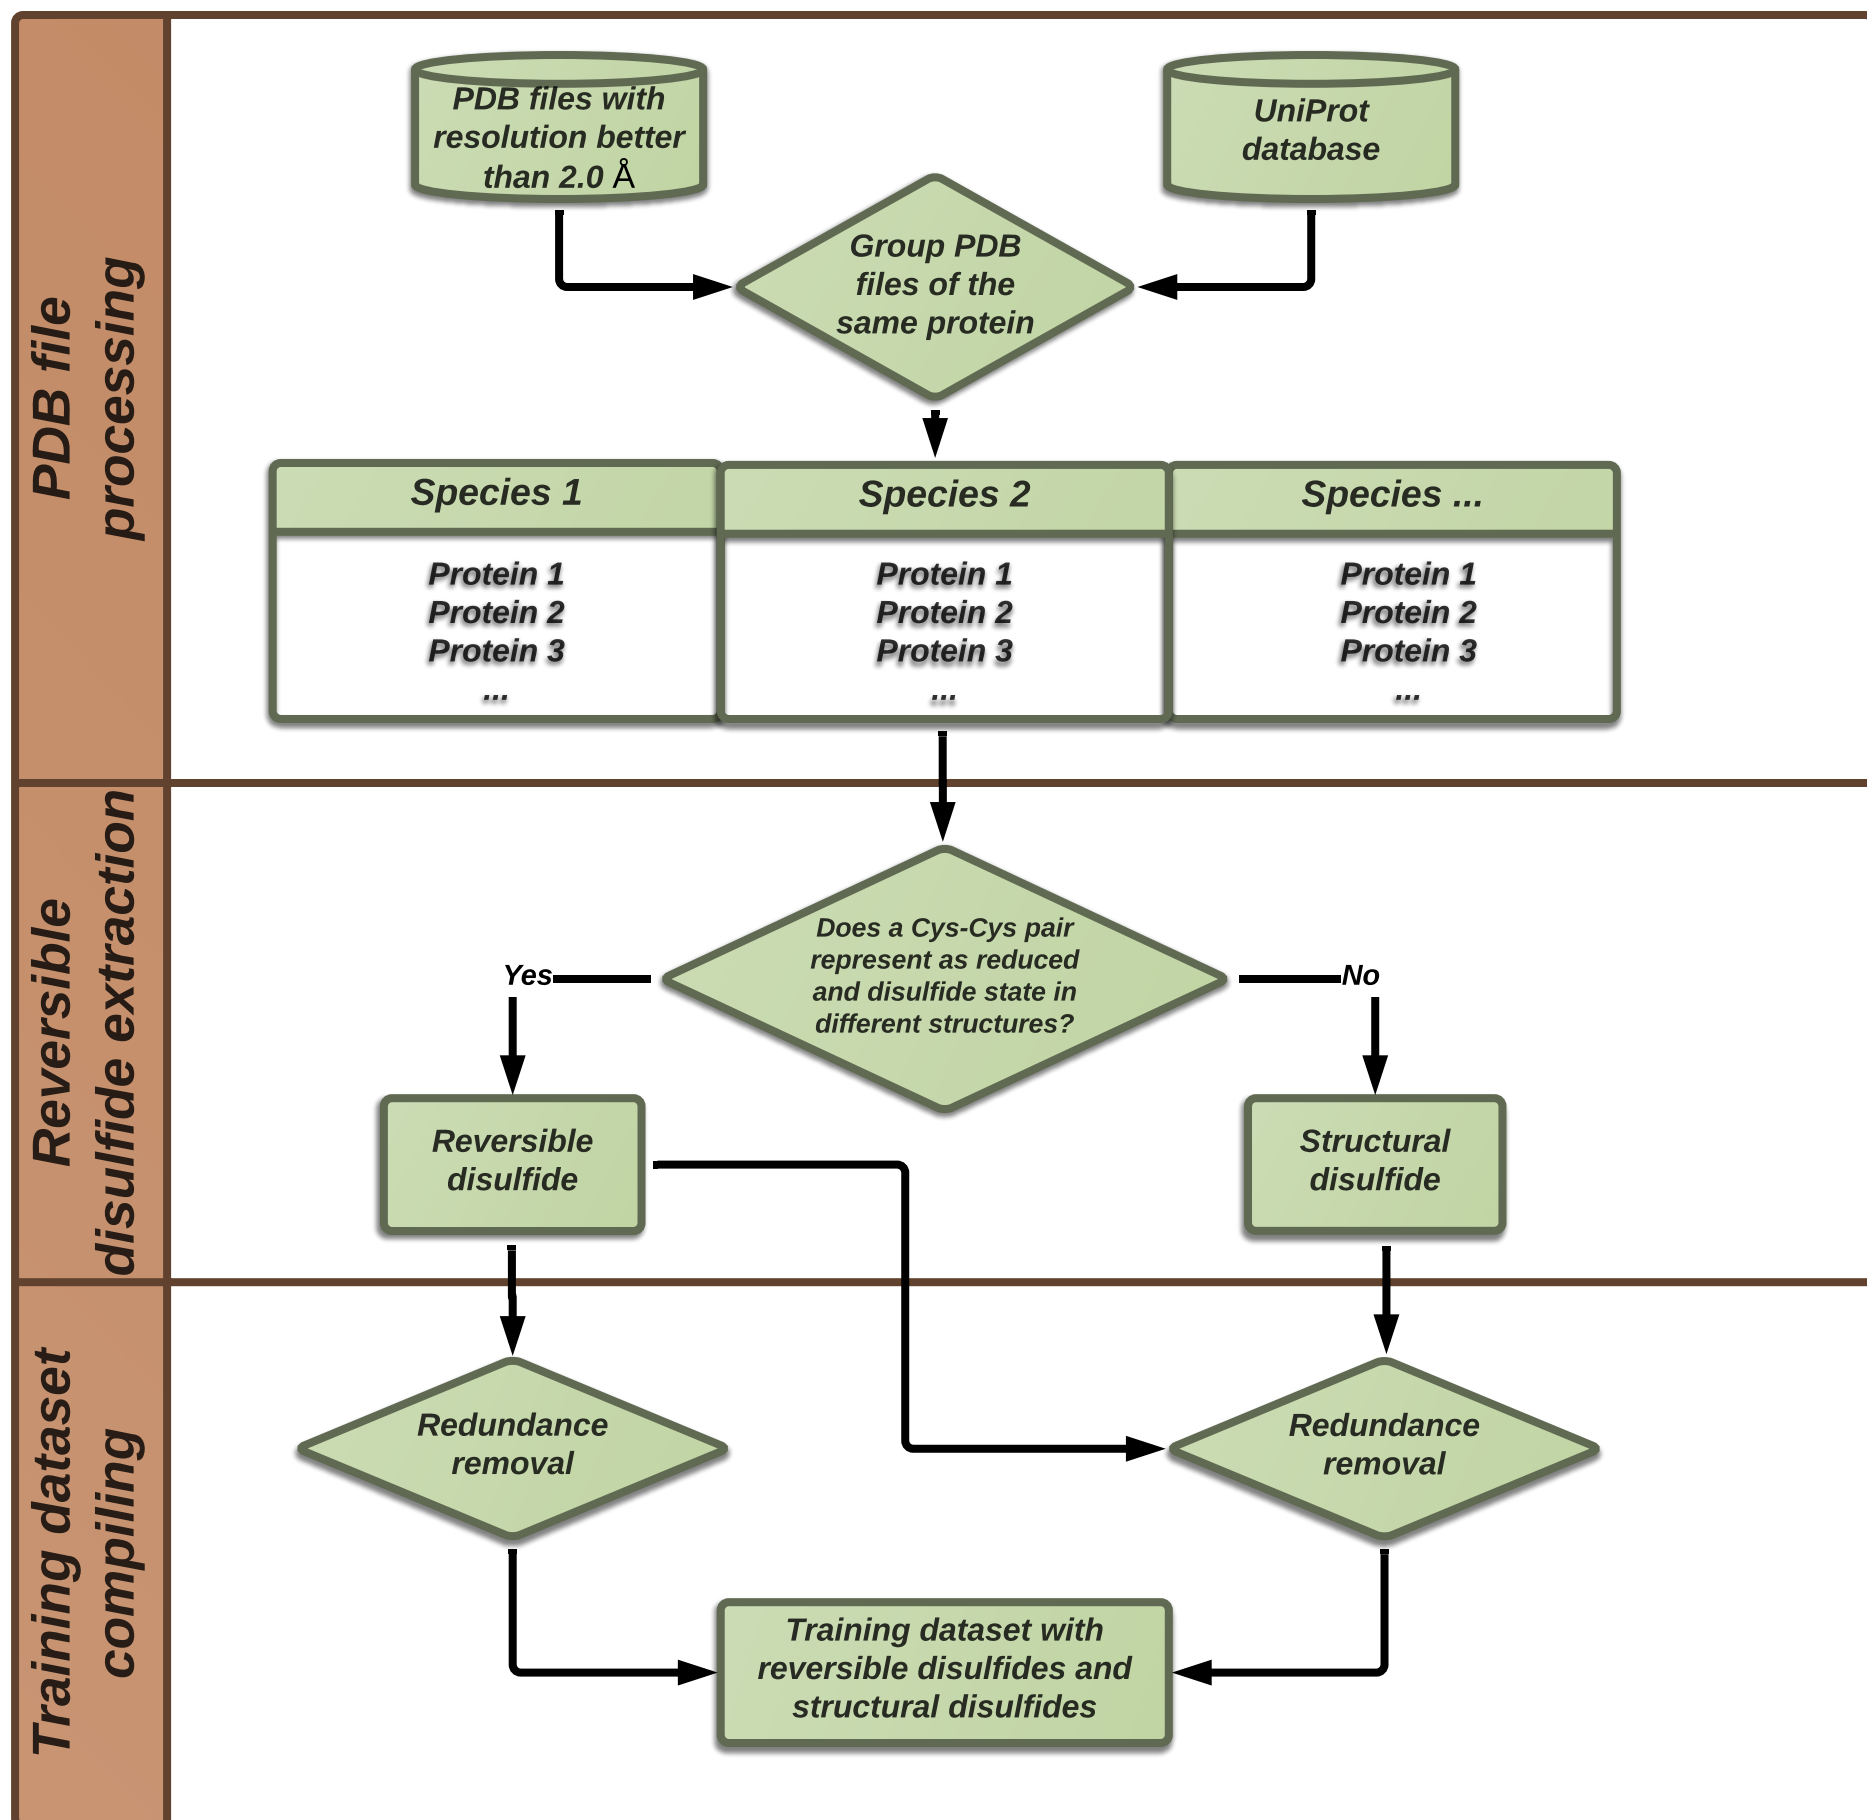

Supplement: 12864_2017_3668_MOESM1_ESM.pdf [file 12864_2017_3668_MOESM1_ESM.pdf]
