# Supplementary material for: Prediction of reversible disulfide based on features from local structural signatures
Source: PubMed Central journal article supplement (PMC5379614; doi:10.1186/s12864-017-3668-8), 2017-04-04
Supplement: 12864_2017_3668_MOESM4_ESM.pdf [file 12864_2017_3668_MOESM4_ESM.pdf]

**a**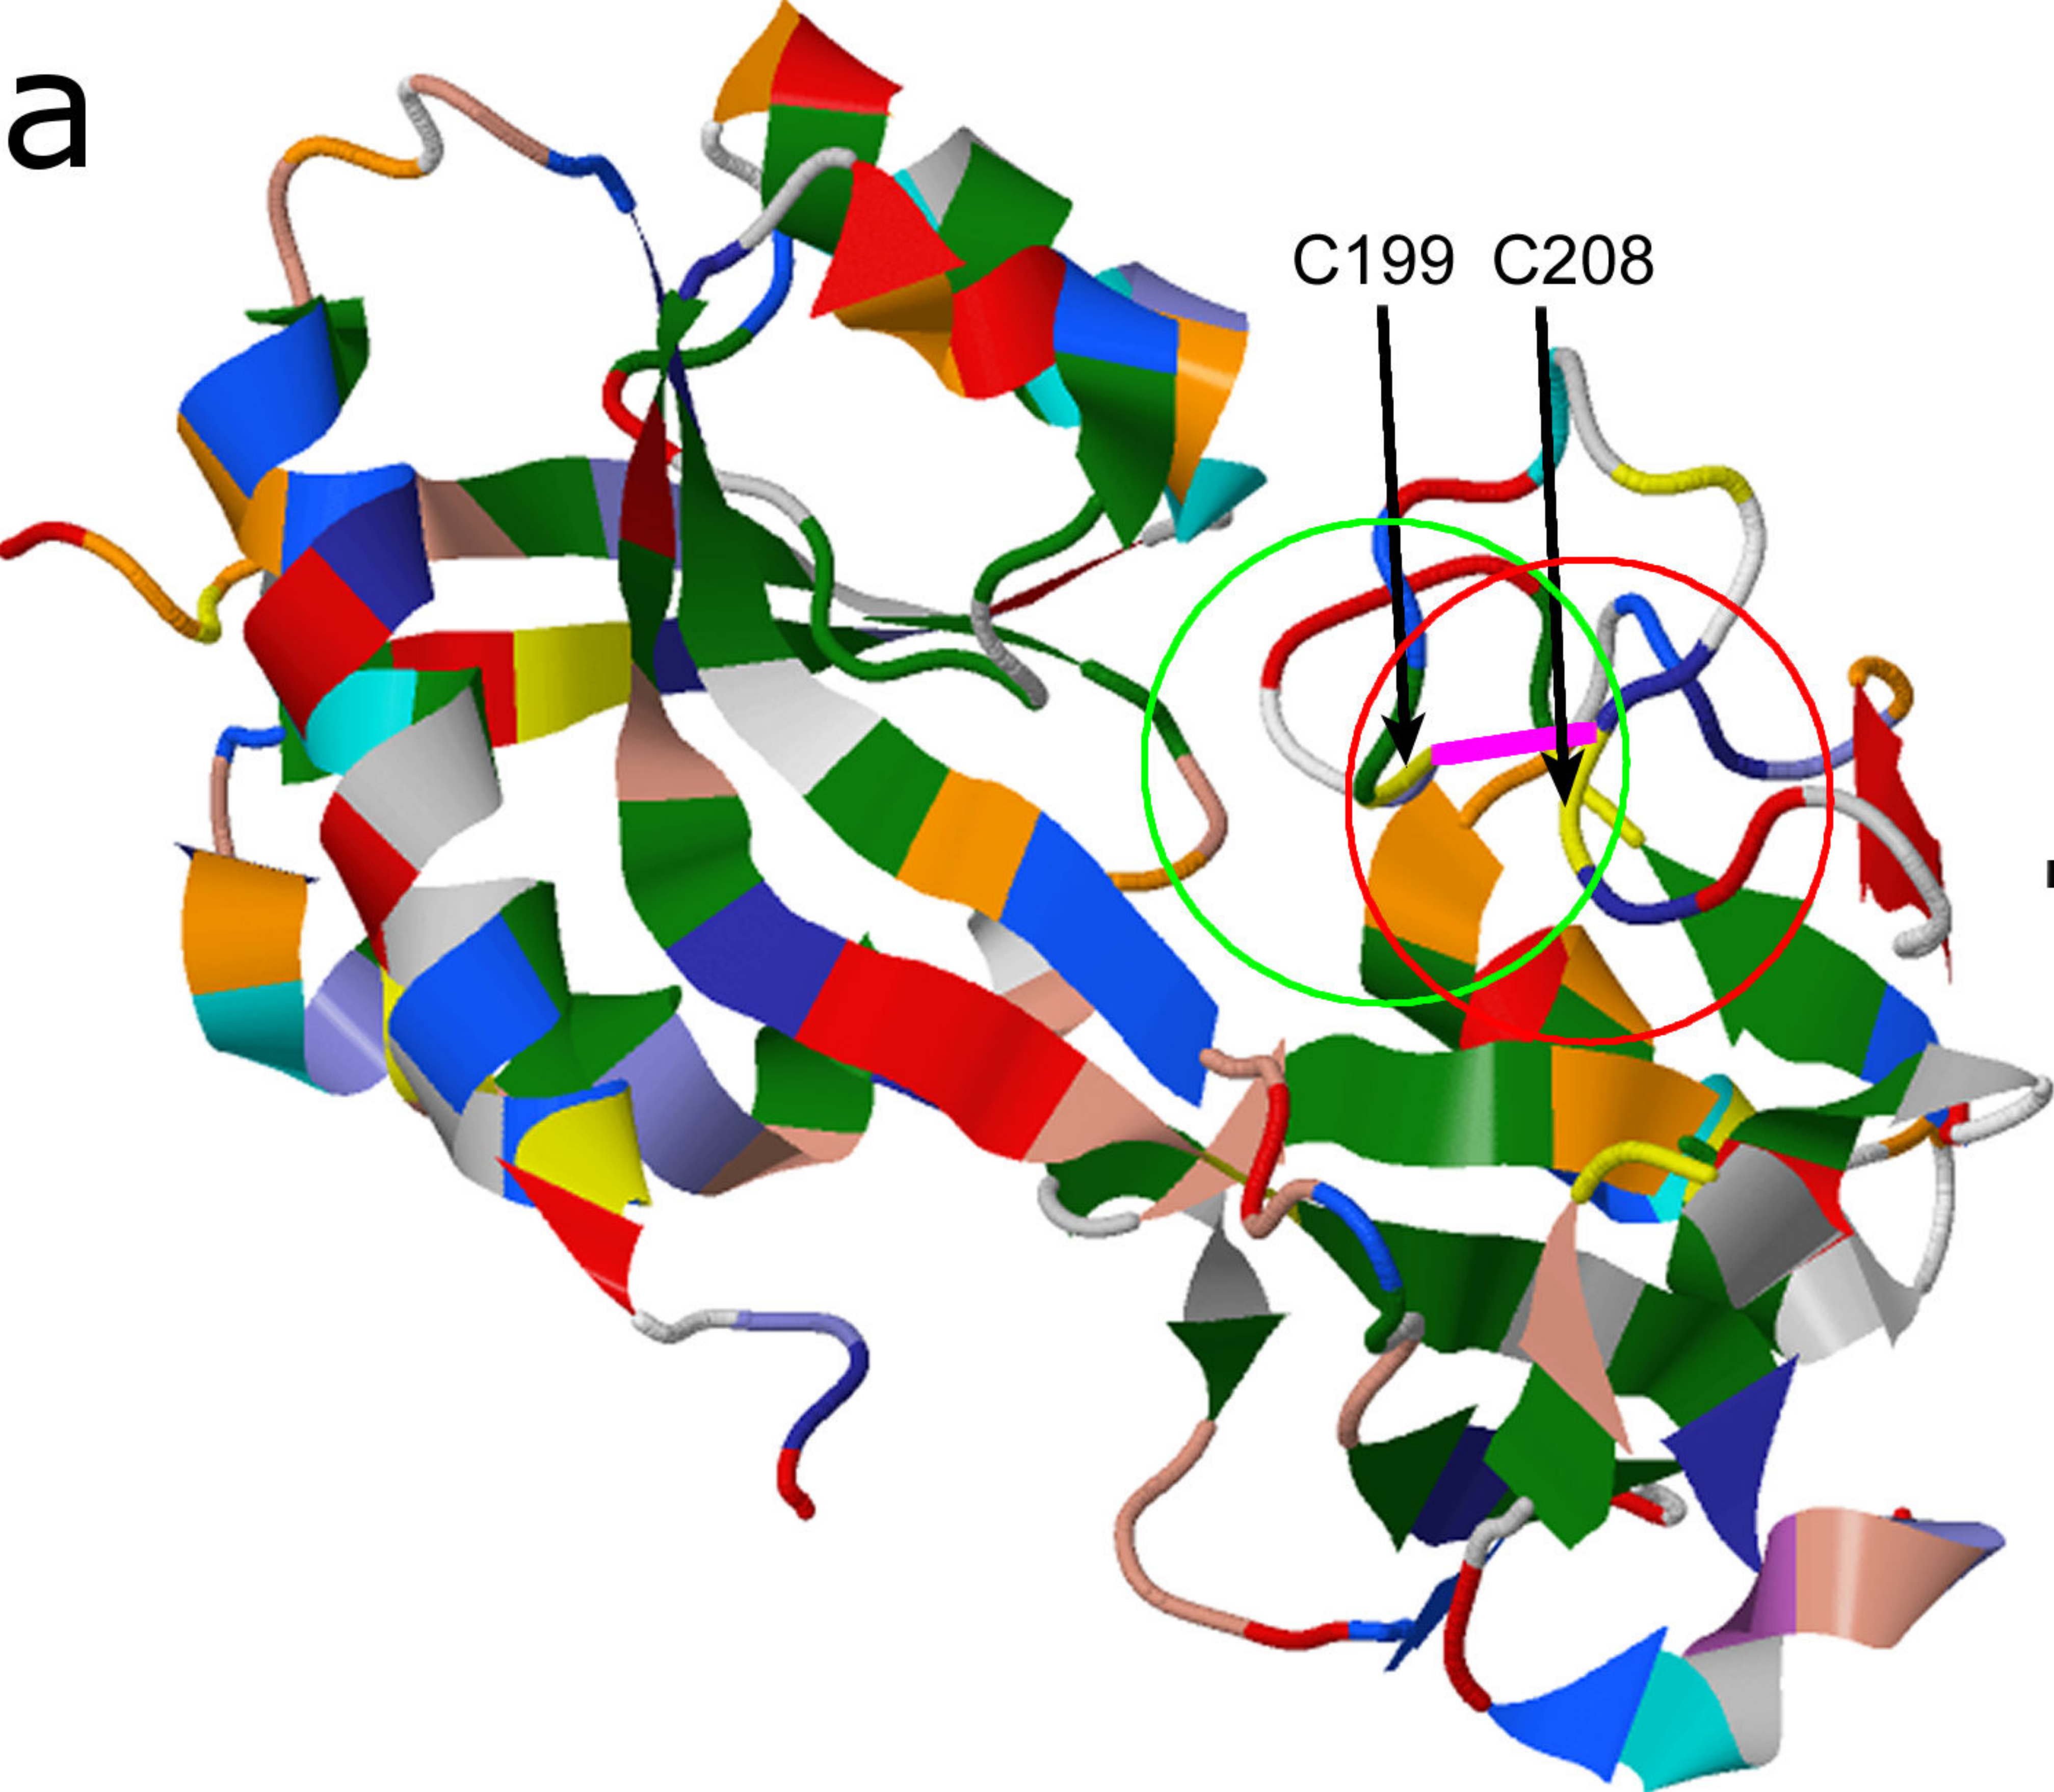**b**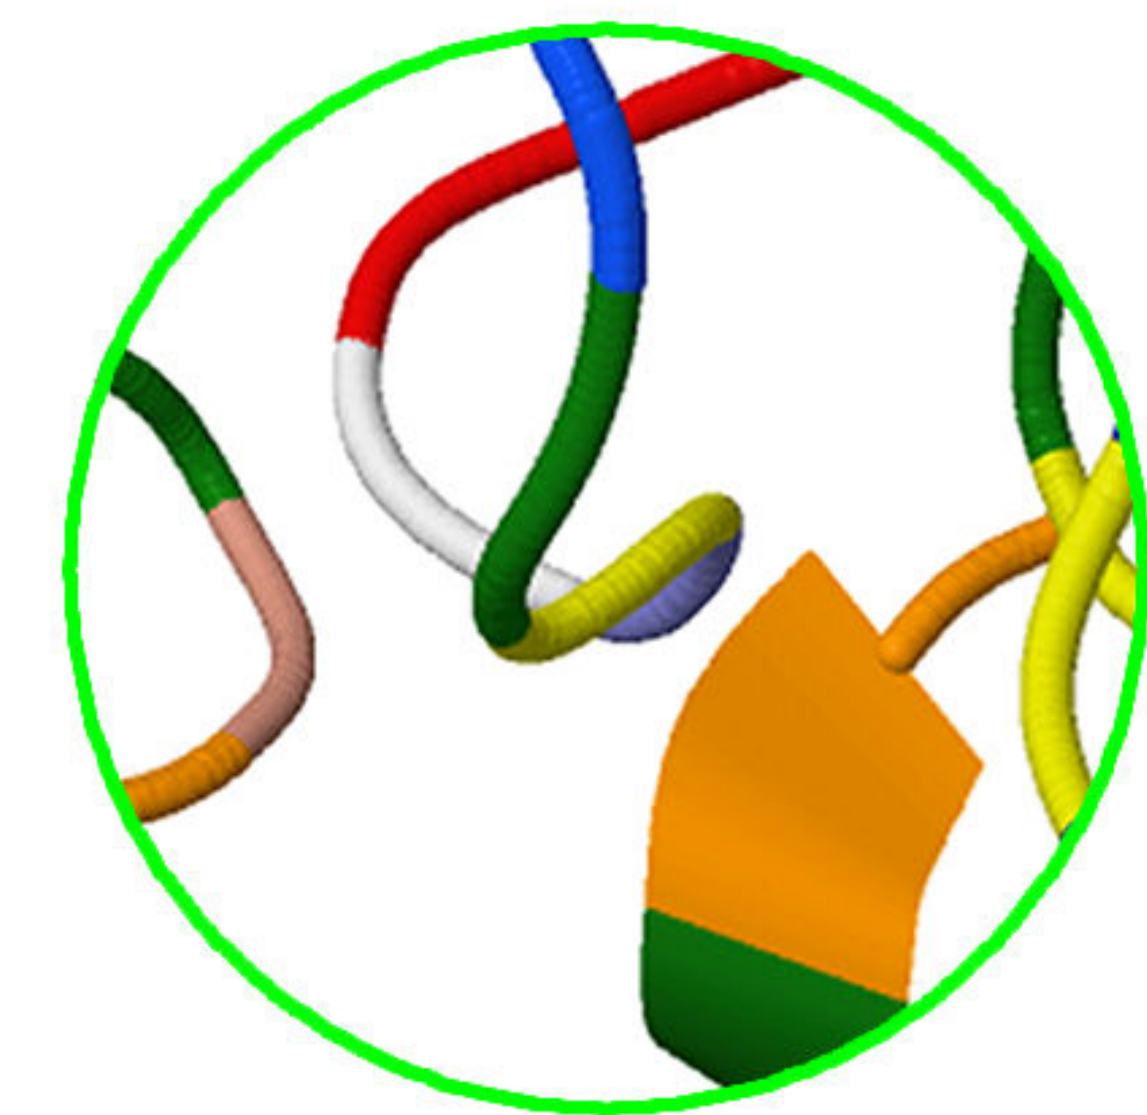

>116A\_A\_C199  
AMLE $\bar{D}$ G $\bar{H}$ **C**LRDQFCFELR

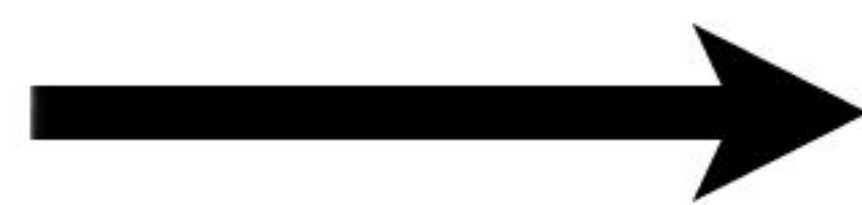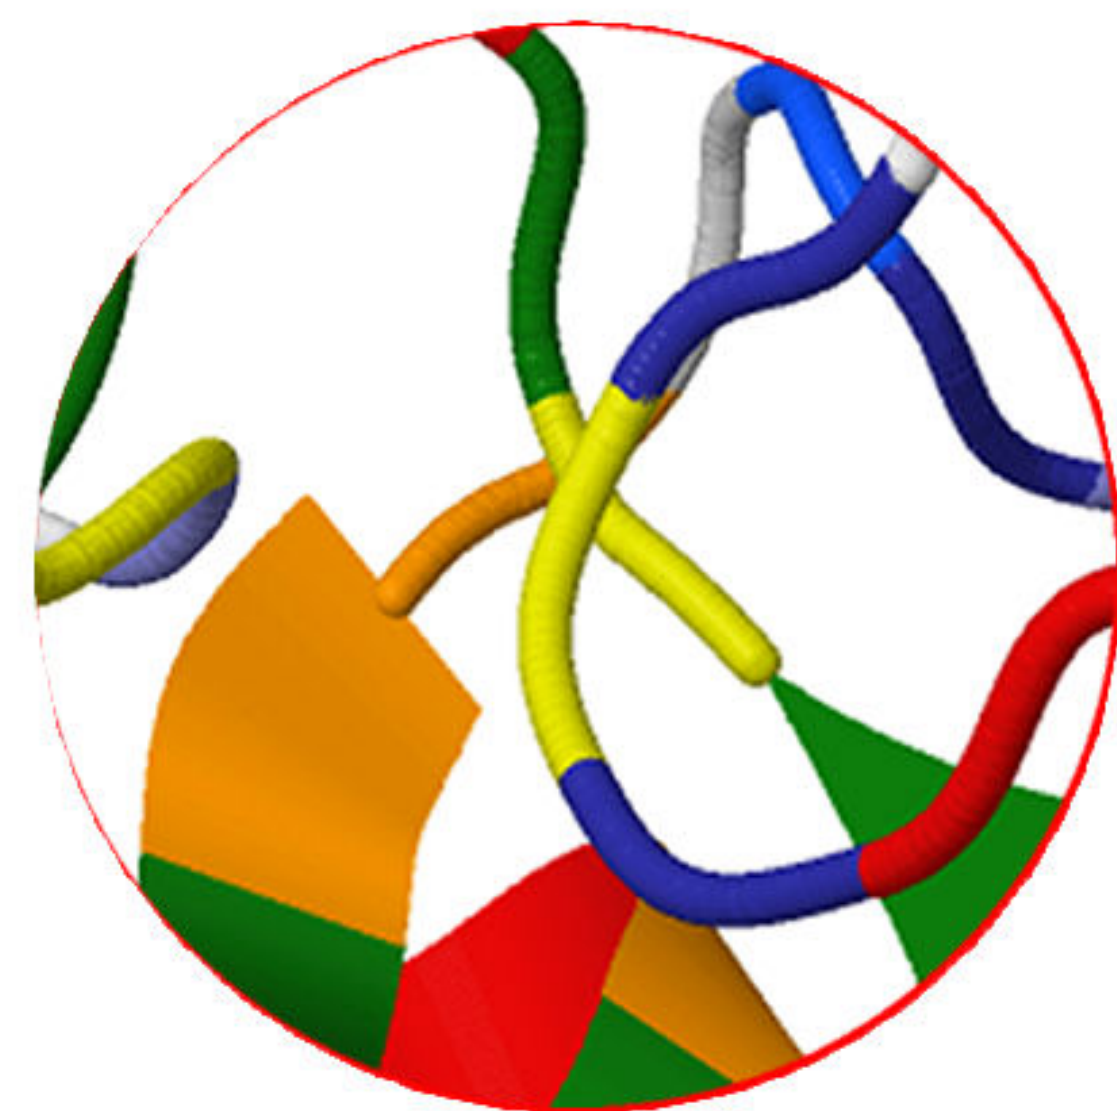

>116A\_A\_C208  
LLMLE $\bar{H}$ **C**LRDQAMGFCFEAAE
